# The American Journal of Psychiatry

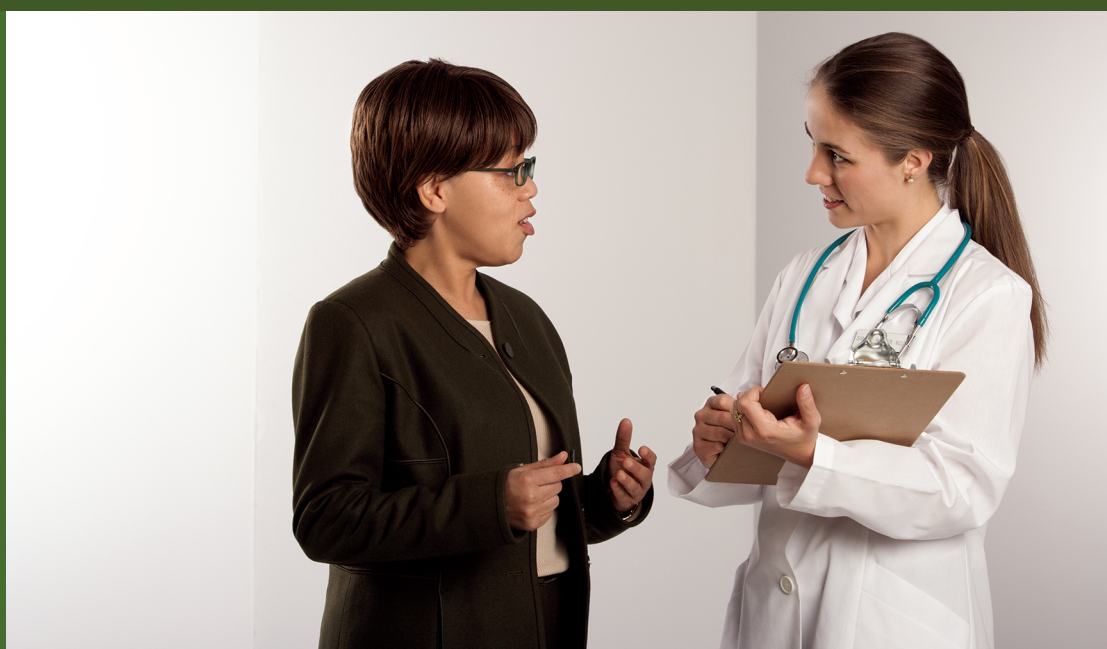

Integrating Primary Care and Behavioral Health: The Role  
of the Psychiatrist in the Collaborative Care Model

John and Alicia Nash: A Beautiful Love Story

Depression Subtypes in Predicting Antidepressant Response:  
A Report From the iSPOT-D Trial

Clonidine Maintenance Prolongs Opioid Abstinence and  
Decouples Stress From Craving in Daily Life: A Randomized  
Controlled Trial With Ecological Momentary Assessment
