## PERSPECTIVAS

### EDITORIALES

- 697 Marcadores genéticos clínicamente útiles de la respuesta a los antidepresivos: ¿Cómo llegamos hasta allá desde donde estamos?**  
*Francis J. McMahon, M.D.*
- 700 Un nuevo rol para la clonidina en las adicciones: Detección de las recaídas antes de que ocurran**  
*Harriet deWit, Ph.D.*
- 702 Interacciones entre los genes y el entorno en el cerebro: ¿Una vía hacia el TDAH?**  
*Philip Shaw, M.D., Ph.D.*
- 704 La amígdala en alerta**  
*Sohee Park, Ph.D., Megan Ichinose, M.A.* **AUDIO**

### COMENTARIO

- 706 Ética, interrogatorios y la American Psychiatric Association**  
*Paul Summergrad, M.D., and Steven S. Sharfstein, M.D.*
- 708 ¿Les estamos dando la espalda a nuestros pacientes?: Formando psiquiatras en la era de la historia clínica electrónica**  
*Sonya Rasminsky, M.D., et al.*

### INTROSPECCIÓN

- 710 John y Alicia Nash: Una bella historia de amor**  
*Nancy C. Andreasen, M.D., Ph.D.*

### DISCURSO PRESIDENCIAL DE LA APA

- 714 Visión a futuro**  
*Paul Summergrad, M.D.*
- 717 Respuesta al discurso presidencial**  
*Renee Binder, M.D.*
- 719 Paul Summergrad, M.D., 141<sup>º</sup> Presidente, 2014–2015**  
*Randy S. Glassman, M.D.*

### TRATAMIENTO EN PSIQUIATRÍA

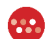

- 721 Integrando la atención primaria y la salud comportamental: El papel del psiquiatra en el modelo de atención colaborativa**  
*Lori E. Raney, M.D.* **AUDIO • Clinical Guidance**

### IMÁGENES EN PSIQUIATRÍA

- 729 Goldwater vs. Ginzburg**  
*John Martin-Joy, M.D.*

## RESÚMENES Y RESEÑAS

-  **731 Manejo farmacológico de la demencia de cuerpos de Lewy: Un meta-análisis y una revisión sistemática**  
*Chris Stinton, Ph.D., et al.* CME • AUDIO • *Clinical Guidance*

## NUEVAS INVESTIGACIONES

### ARTÍCULOS

- 743 Subtipos de depresión en la predicción de la respuesta a los antidepresivos: Un informe del ensayo A de iSPOT-D**  
*Bruce A. Arnow, Ph.D., et al.* EDITORIAL • CME • AUDIO • VIDEO • *Clinical Guidance*
- 751 Los efectos del gen ABCB1 en los resultados de los antidepresivos: Un informe del Ensayo iSPOT-D**  
*Alan F. Schatzberg, M.D., et al.* EDITORIAL • *Clinical Guidance*
-  **760 El mantenimiento con clonidina prolonga la abstinencia de opiáceos y desconecta el estrés de las ansias de consumir en la vida diaria: Un ensayo controlado aleatorizado con evaluación ecológica momentánea**  
*William J. Kowalczyk, Ph.D., et al.* EDITORIAL • CME • AUDIO • *Clinical Guidance*
- 768 Correlatos cerebrales de la interacción entre el 5-HTTLPR y el estrés psicosocial que media la severidad del trastorno por déficit de atención e hiperactividad.**  
*Dennis van der Meer, M.Sc., et al.* EDITORIAL
- 776 Mortalidad en los treinta días posteriores a la infección en personas con enfermedades mentales graves: Un estudio de cohortes basado en la población en Dinamarca**  
*Anette Riisgaard Ribe, M.D., et al.*
- 784 Hiperactividad de la amígdala en individuos paranoides con esquizofrenia**  
*Amy E. Pinkham, Ph.D., et al.* EDITORIAL • AUDIO • VIDEO

## COMUNICADOS Y ACTUALIZACIONES

### CARTAS AL EDITOR

- 793 Ensayos clínicos para el tratamiento del trastorno límite de la personalidad**  
*S. Charles Schulz, M.D., y Donald W. Black, M.D.*
- 793 El CI como un marcador de responsabilidad genética en familiares de pacientes con esquizofrenia**  
*Massimiliano Buoli, M.D., y Alice Caldiroli, M.D.*
- 794 [Response to Buoli et al.]**  
*Kenneth S. Kendler, M.D.*
- 795 Después del trauma nacional: Reacciones psicológicas después del ataque de terror de Charlie Hebdo**  
*Menachem Ben-Ezra, Ph.D., et al.*
- 796 Depresión y resistencia a la insulina: Apoyo adicional para el nuevo modelo heurístico en la depresión perimenopáusica**  
*Pasi J. Eskola, M.D., Ph.D., et al.*
- 797 [Response to Eskola et al.]**  
*Jennifer L. Gordon, Ph.D., et al.*

### ACTOS OFICIALES

- 798 Las guías de consulta de la American Psychiatric Association para la evaluación psiquiátrica de adultos**  
*Joel J. Silverman, M.D., et al.*
- 803 [Reports to the Membership]**
- 812 [Correction]**

**813 Educación Médica Continuada**

**Cubierta:** [The collaborative care model has at its core a team approach that utilizes indirect and direct psychiatric consultation to optimize behavioral treatment in the primary care setting, as described by Raney (p. 721).]

Article content that addresses **Core Competencies**, defined by the Accreditation Council of Graduate Medical Education and the American Board of Medical Specialties, is indicated by the following symbols:

-  Professionalism
-  Patient Care and Procedural Skills
-  Medical Knowledge
-  Practice-Based Learning and Improvement
-  Interpersonal and Communication Skills
-  Systems-Based Practice.

More information is available at [www.abms.org/maintenance\\_of\\_certification/MOC\\_competencies.aspx](http://www.abms.org/maintenance_of_certification/MOC_competencies.aspx)

- AUDIO** Highlighted in AJP Audio, a downloadable .mp3 file available at [ajp.psychiatryonline.org](http://ajp.psychiatryonline.org)
- CME** A course covering the content of this article is available online for paid subscribers to the AJP CME Course program
- EDITORIAL** Discussed in one of the issue's editorials
- VIDEO** Highlighted online by Deputy Editor Daniel S. Pine, M.D.

**La Tabla de Contenidos y resúmenes de Este Número Está Disponible en Español**

*(This issue's Table of Contents and abstracts are available in Spanish)*

Translation presented in collaboration with the Office of Global Health, Rutgers-Robert Wood Johnson Medical School

Support for this effort provided by ACTA Colombia.

**Translation courtesy of**

**Sergi Casals, M.A.**, Garuna, Medellín, Colombia ([www.garunaeditors.com](http://www.garunaeditors.com))

**Carlos Lopez Jaramillo, M.D.**, Universidad de Antioquia, Medellín, Colombia

**Javier I. Escobar, M.D., M.Sc.**, Rutgers-Robert Wood Johnson Medical School

# Manejo farmacológico de la demencia de cuerpos de Lewy: Un meta-análisis y una revisión sistemática.

Chris Stinton, Ph.D. Ian McKeith, F.Med.Sci., John-Paul Taylor, Ph.D., Louise Lafortune, Ph.D., Eneida Mioshi, Ph.D., Elijah Mak, M.Sc., Victoria Cambridge, Ph.D., James Mason, D.Phil., Alan Thomas, Ph.D., John T. O'Brien, D.M.

**Objetivo:** Los autores examinaron la investigación realizada sobre los efectos, los costes y las perspectivas tanto de los pacientes como de los cuidadores, de las estrategias de manejo psicológico para la demencia de cuerpos de Lewy.

**Método:** Se identificaron los estudios por medio de bases de datos bibliográficas, registros de estudios, literatura gris, listas de referencia y expertos. Los autores utilizaron los términos de búsqueda "Lewy o parkinson" y "demencia" hasta Marzo 2015 y emplearon los siguientes criterios de inclusión: participantes con diagnóstico de demencia de cuerpos de Lewy, demencia con cuerpos de Lewy, o demencia de la enfermedad de Parkinson (o de los cuidadores de los participantes); investigación de estrategias de manejo farmacológico; medidas de resultados y puntajes reportados. La extracción de datos y la evaluación de calidad fueron llevados a cabo por dos autores como mínimo. Se hicieron meta-análisis y cuando los estudios no se pudieron combinar, se ofrecieron resúmenes.

**Resultados:** En la revisión se incluyeron 44 estudios en los que se examinaban 22 estrategias. Los meta-análisis indic-

aron efectos beneficiosos del donepezil y la rivastigmina para los síntomas cognitivos y psiquiátricos. La rivastigmina, pero no el donepezil, se asoció con un mayor riesgo de eventos adversos. Los meta-análisis de memantina sugirieron que ésta es bien tolerada, pero trae pocos beneficios. Los resúmenes descriptivos brindan cierta evidencia de los beneficios de la galantamina, el modafinil, la levodopa, la rotigotina, la clozapina, la duloxetina, el clonazepam, ramelteon, gabapentina, zonisamida y yokukansan. El piracetam, la amantadina, la selegilina, la olanzapina, la quetiapina, la risperidona y el citalopram no parecen ser efectivos.

**Conclusiones:** La evidencia de alto nivel relacionada con las estrategias farmacológicas para manejar la demencia de cuerpos de Lewy es escasa. No se ha investigado sobre estrategias para áreas de necesidad importantes en la demencia de cuerpos de Lewy, como los síntomas autonómicos o la carga del cuidador, ni sobre los puntos de vista de los pacientes y los cuidadores sobre las estrategias farmacológicas.

(*Am J Psychiatry* 2015; 172:731–742)

## Subtipos de depresión en la predicción de la respuesta a los antidepresivos: Un informe del Ensayo iSPOT-D

Bruce A. Arnow, Ph.D., Christine Blasey, Ph.D., Leanne M. Williams, Ph.D., Donna M. Palmer, Ph.D., William Rekshan, B.A., Alan F. Schatzberg, M.D., Amit Etkin, M.D., Ph.D., Jayashri Kulkarni, M.B.B.S., Ph.D., James F. Luther, M.A., A. John Rush, M.D.

**Objetivo:** El estudio tiene como objetivos: 1) describir las características de los individuos que cumplieron los criterios de los subtipos depresivos melancólico, atípico y ansioso, y de las combinaciones de subtipos, en una muestra grande de pacientes externos deprimidos, y 2) comparar los perfiles de los subtipos en remisión y el cambio en los síntomas depresivos después de un tratamiento agudo con uno de tres medicamentos antidepresivos.

**Método:** Los participantes, de entre 18 y 65 años (N=1.008), que cumplieron los criterios de trastorno depresivo mayor fueron asignados de forma aleatoria para recibir 8 semanas de tratamiento con escitalopram, sertralina o venlafaxina de liberación prolongada. Los participantes fueron clasificados por subtipo de depresión. Los que no cumplieron los criterios de ningún subtipo y los que cumplieron los de varios subtipos fueron clasificados en grupos separados, y se obtuvieron ocho grupos mutuamente exclusivos. Con un modelo de efectos mixtos que usaba la muestra con intención de tratar se compararon las trayectorias de los síntomas de los diferentes grupos, y con regresión logística se comparó la probabilidad de remisión (definida como un puntaje de  $\leq 5$  en el Inventario Rápido de Sintomatología Depresiva Auto-Reportada de 16 puntos).

**Resultados:** Treinta y nueve por ciento de los pacientes exhibieron un subtipo de depresión en estado puro, 36% reunieron criterios de más de un subtipo y 25% no cumplieron los criterios de ningún subtipo. Todos los grupos de subtipos de depresión tuvieron una trayectoria similar de reducción de síntomas a lo largo del estudio. La probabilidad de remisión no difirió de manera significativa entre los grupos de los subtipos, y el subtipo de depresión no fue un moderador del efecto del tratamiento.

**Conclusiones:** Hubo un solapamiento sustancial de los tres subtipos depresivos, y los individuos en todos los grupos de subtipos respondieron de forma similar a los tres antidepresivos. La consistencia de estos hallazgos con los del ensayo Alternativas Secuenciadas de Tratamiento para Aliviar la Depresión (*Sequenced Treatment Alternatives to Relieve Depression*) sugiere que los subtipos pueden ser de valor mínimo para la selección de antidepresivos.

(*Am J Psychiatry* 2015; 172:743–750)

## Los efectos del gen ABCB1 en los resultados de los antidepresivos: Un informe del Ensayo iSPOT-D

Alan F. Schatzberg, M.D., Charles DeBattista, M.D., Laura C. Lazzeroni, Ph.D., Amit Etkin, M.D., Ph.D., Greer M. Murphy, Jr., M.D., Ph.D., Leanne M. Williams, Ph.D.

**Objetivo:** El gen ABCB1 codifica la glicoproteína P, que limita las concentraciones cerebrales de ciertos antidepresivos. La variación del gen ABCB1 se ha asociado con la eficacia de los antidepresivos y con efectos secundarios en estudios con muestras pequeñas. El deterioro cognitivo en el trastorno depresivo mayor predice bajo resultado del tratamiento, pero los efectos del gen ABCB1 en pacientes con deterioro cognitivo no se han evaluado. Los autores examinaron las variantes genéticas del gen ABCB1 como predictores de remisión y efectos secundarios en un ensayo clínico grande que incorporó evaluación cognitiva.

**Método:** Los autores establecieron genotipos de 10 polimorfismos de un solo mono nucleótido (SNPs) del gen ABCB1 en 683 pacientes con trastorno depresivo mayor tratado por lo menos durante 2 semanas, de los cuales 576 completaron 8 semanas de tratamiento con escitalopram, sertralina o venlafaxina de liberación prolongada (todos sustratos para la glicoproteína P) en un ensayo grande, pragmático, prospectivo y aleatorizado. La eficacia de los antidepresivos se evaluó con el Inventario Rápido de Sintomatología Depresiva Auto-Reportada (QIDS-SR) de 16 puntos, y los efectos secundarios con una escala de evalu-

ación que medía la frecuencia, la intensidad y la carga de los efectos secundarios. La cognición general y emocional se evaluó con una batería de 13 pruebas.

**Resultados:** El SNP funcional rs10245483 *upstream* ("río arriba") del gen ABCB1 tuvo un efecto significativo en las evaluaciones de la remisión y los efectos secundarios, que estuvo diferencialmente relacionado con el medicamento y el estatus cognitivo. Los homocigotos comunes respondieron mejor y tuvieron menos efectos secundarios con escitalopram y sertralina. Los homocigotos de alelos menores respondieron mejor y tuvieron menos efectos secundarios con venlafaxina, y la mejor respuesta fue más evidente en los pacientes con deterioro cognitivo.

**Conclusiones:** El polimorfismo funcional rs10245483 afecta de manera diferencial la remisión de síntomas y los efectos secundarios dependiendo del antidepresivo. El poder predictivo del SNP para la respuesta a los efectos secundarios no se vio disminuido por la presencia del deterioro cognitivo.

(*Am J Psychiatry* 2015; 172:751–759)

## El mantenimiento con clonidina prolonga la abstinencia de opiáceos y desconecta el estrés de las ansias de consumir en la vida diaria: Un ensayo controlado aleatorizado con evaluación ecológica momentánea

William J. Kowalczyk, Ph.D., Karran A. Phillips, M.D., Michelle L. Jobes, Ph.D., Ashley P. Kennedy, Ph.D., Udi E. Ghitza, Ph.D., Daniel A. Agage, M.D., John P. Schmittner, M.D., David H. Epstein, Ph.D., Kenzie L. Preston, Ph.D.

**Objetivo:** Los autores examinaron si la clonidina bloquea la búsqueda inducida por el estrés de heroína y cocaína. El estudio también tenía como objetivo confirmar los hallazgos de traslación de un modelo animal con ratones de laboratorio de recaída en las drogas, por medio de la evaluación momentánea del estrés de los pacientes para comprobar las hipótesis sobre el mecanismo de acción de la clonidina sobre el comportamiento.

**Método:** Los autores llevaron a cabo un ensayo clínico, doble ciego, controlado con placebo en 280 pacientes dependientes de opiáceos en una clínica ambulatoria de buprenorfina. Los 118 participantes (57%) que mantuvieron abstinencia durante las semanas 5–6 siguieron con buprenorfina y fueron asignados de forma aleatoria para recibir clonidina (N=61) o placebo (N=57) por 14 semanas. Se hicieron exámenes de orina tres veces por semana. Se definió lapso como cualquier examen de orina que diera positivo por opioides o que no se hubiera hecho, y relapso como dos o más lapsos consecutivos. Se evaluó el tiempo hasta el lapso o el relapso con regresiones de Cox; el período de abstinencia más largo se evaluó con un t-test, y los datos de evaluación ecológica momentánea se examinaron con modelos lineales mixtos generalizados.

**Resultados:** En un análisis con intención de tratar, la clonidina produjo la mayor duración (en días consecutivos) de abstinencia de opiáceos durante la fase de intervención (34,8 días [DE=3,7] comparado con 25,5 días [DE=2,7]; d de Cohen=0,38). No hubo diferencia entre grupos en el tiempo hasta el relapso, pero el grupo de clonidina tardó más hasta el lapso (cociente de riesgo=0,67; IC 95%=0,45–1,00). La evaluación ecológica momentánea mostró que el estrés de la vida diaria estaba parcialmente separado de las ansias de consumir opiáceos en el grupo de la clonidina, apoyando el mecanismo que los autores habían planteado en su hipótesis para los beneficios de la clonidina.

**Conclusiones:** La clonidina, una medicación de fácil acceso, es útil en la dependencia de opiáceos no sólo para la reducción de los signos de abstinencia, sino también como un tratamiento adjunto de mantenimiento que aumenta la duración de la abstinencia. Incluso cuando no hay abstinencia física, separa el estrés de las ansias en la vida diaria.

*(Am J Psychiatry 2015; 172:760–767)*

# Correlatos cerebrales de la interacción entre el 5-HTTLPR y el estrés psicosocial que media la severidad del trastorno por déficit de atención e hiperactividad

Dennis van der Meer, M.Sc., Pieter J. Hoekstra, M.D., Ph.D., Marcel Zwiers, Ph.D., Maarten Mennes, Ph.D., Lizanne J. Schweren, M.Sc., Barbara Franke, Ph.D., Dirk J. Heslenfeld, Ph.D., Jaap Oosterlaan, Ph.D., Stephen V. Faraone, Ph.D., Jan K. Buitelaar, M.D., Ph.D., Catharina A. Hartman, Ph.D.

**Objetivo:** Se ha encontrado que el genotipo del transportador de serotonina 5-HTTLPR modera el efecto del estrés en la severidad del trastorno por déficit de atención e hiperactividad (TDAH), con efectos más fuertes en los portadores del alelo corto que en los individuos homocigotos para el alelo largo. Se desconoce el mecanismo neurobiológico subyacente de esta interacción entre los genes y el entorno en TDAH. Los autores se propusieron determinar si el 5-HTTLPR modera el efecto del estrés sobre el volumen de sustancia gris en el cerebro y, en tal caso, qué regiones cerebrales median el efecto que esta interacción entre los genes y el entorno tiene sobre la severidad del TDAH.

**Método:** Se obtuvieron datos de IRM estructural, el genotipo 5-HTTLPR y cuestionarios de exposición al estrés de 701 adolescentes y adultos jóvenes que participaron en el estudio de cohorte de TDAH *NeuroIMAGE* (de 385 familias; 291 con TDAH, 78 con TDAH subumbral, 332 sujetos sanos de comparación; 55,8% hombres; edad promedio: 17,0 años). El recuento de síntomas de TDAH se determinó por medio de cuestionarios para informantes múltiples. Para el análisis, se

combinó un enfoque de morfometría basada en vóxel de todo el cerebro con el análisis de mediación.

**Resultados:** La exposición al estrés se asoció con un volumen de sustancia gris significativamente inferior en el giro pre-central, en los giros medio y superior, el polo frontal y el giro cingulado en los portadores del alelo S comparados con participantes homocigotos para el alelo I. La asociación de esta interacción entre genes y entorno con el recuento de síntomas de TDAH fue mediada por la sustancia gris en el polo frontal y el giro cingulado anterior.

**Conclusiones:** El genotipo 5-HTTLPR modera el efecto del estrés en las regiones cerebrales implicadas en el procesamiento cognitivo social y el control cognitivo. Concretamente, las regiones importantes para el control cognitivo enlazan esta interacción genes-entorno con la severidad del TDAH.

(*Am J Psychiatry* 2015; 172:768–775)



## Mortalidad en los treinta días después de la infección en personas con enfermedades mentales graves: Un estudio de cohortes basado en la población en Dinamarca

Anette Riisgaard Ribe, M.D., Mogens Vestergaard, M.D., Wayne Katon, M.D., Morten Charles, M.D., Michael Eriksen Benros, M.D., Erik Vanderlip, M.D., Merete Nordentoft, M.D., Thomas Munk Laursen, Ph.D.

**Objetivo:** Las personas con enfermedades mentales graves mueren en promedio de 15 a 20 años antes que las personas sin enfermedades mentales graves. Aunque la infección es una de las principales causas generales de muerte, ningún estudio ha evaluado si las personas con enfermedades mentales graves tienen mayor mortalidad después de la infección que las que no sufren dichas enfermedades.

**Método:** Los autores estudiaron las proporciones de tasas de mortalidad y las proporciones acumulativas de mortalidad después de una hospitalización por infección en personas con enfermedades mentales graves comparadas con personas sin enfermedades mentales graves.

**Resultados:** La cohorte consistía en todas las personas hospitalizadas por infección durante el período 1995–2011 en Dinamarca (N=806.835), de los cuales 11.343 personas tenían enfermedades mentales graves. En los 30 días posteriores a la infección murieron 1.052 (9,3%) personas con historial de enfermedad mental grave y 58.683 (7,4%) personas sin historial de enfermedad mental grave. La mortalidad en

los treinta días posteriores a cualquier infección fue 52% mayor en personas con enfermedades mentales graves que en personas sin dichas enfermedades (proporción de tasa de mortalidad=1,52; IC 95%=1,43–1,61). La mortalidad fue más alta para todas las infecciones, y las proporciones de tasas de mortalidad oscilaron entre 1,27 (IC 95%=1,5–1,9) para personas hospitalizadas por sepsis, hasta 2,61 (IC 95%=1,69–4,02) para personas hospitalizadas por infecciones del SNC. Dependiendo de la edad, se observaron entre 1,7 (IC 95%=1,2–2,2) hasta 2,9 (IC 95%=2,0–3,7) muertes más en los 30 días después de la infección por 100 personas con historial de enfermedad mental grave comparadas con 100 personas sin un historial así.

**Conclusiones:** Las personas con enfermedades mentales graves tienen una mortalidad marcadamente elevada los 30 días posteriores a la infección. Algunas de las muertes pueden ser prevenidas por medio de intervenciones personalizadas con objetivos específicos.

(*Am J Psychiatry* 2015; 172:776–783)

## Hiperactividad de la amígdala en individuos paranoides con esquizofrenia

Amy E. Pinkham, Ph.D., Peiyong Liu, Ph.D., Hanzhang Lu, Ph.D., Michael Kriegsman, B.S., Claire Simpson, M.A., Carol Tamminga, M.D.

**Objetivo:** El papel de la amígdala en la percepción de amenazas sugiere que una activación aumentada de esta región puede estar relacionada con la ideación paranoide. Sin embargo, las investigaciones de la función de la amígdala en los individuos paranoides con esquizofrenia, comparados tanto con individuos sanos como con individuos no paranoides con esquizofrenia, han reportado consistentemente una reducción de la activación relacionada con las tareas. La dependencia de la resonancia funcional del nivel de oxígeno en la sangre para dar un contraste entre los eventos y la línea basal, y la incapacidad de medir cuantitativamente esta línea basal pueden explicar estos hallazgos contradictorios. El estudio actual examinó las diferencias en los niveles de la línea basal de la actividad de la amígdala en individuos paranoides y no paranoides con esquizofrenia utilizando perfusión por resonancia magnética con marcaje del espín arterial.

**Método:** El flujo sanguíneo cerebral (FSC) en reposo y la activación relacionada con tareas de la amígdala se midieron en 25 individuos sanos, 16 individuos con esquizofrenia que estaban activamente paranoides en el momento del escáner, y 16 individuos con esquizofrenia que no estaban paranoides.

**Resultados:** El análisis de los valores relativos de FSC extraídos bilateralmente de la amígdala reveló una actividad significativamente aumentada en la amígdala izquierda en los pacientes voluntarios paranoides, comparados con los sujetos sanos de comparación y los pacientes voluntarios no paranoides. El aumento del FSC también fue evidente en la amígdala derecha, pero no alcanzó el nivel de significancia estadística. Los voluntarios paranoides también mostraron una reducción significativa de la activación de la amígdala relacionada con las tareas en comparación con los otros dos grupos.

**Conclusiones:** Estos hallazgos sugieren que la hiperactivación de la amígdala puede ser subyacente a la paranoia en esquizofrenia. Adicionalmente, las diferencias reportadas entre los pacientes voluntarios paranoides y los no paranoides enfatizan la importancia de considerar subgrupos basados en los síntomas y niveles basales de actividad en futuras investigaciones sobre la activación neuronal en esquizofrenia.

(*Am J Psychiatry* 2015; 172:784–792)
